# Supplementary material for: Equilibrative Nucleoside Transporters Mediate the Import of Nicotinamide Riboside and Nicotinic Acid Riboside into Human Cells
Source: MDPI journal article supplement (doi:10.3390/ijms22031391), 2021-01-30
Supplement: s1 [file s1]

# Supplementary data

## Figure S1

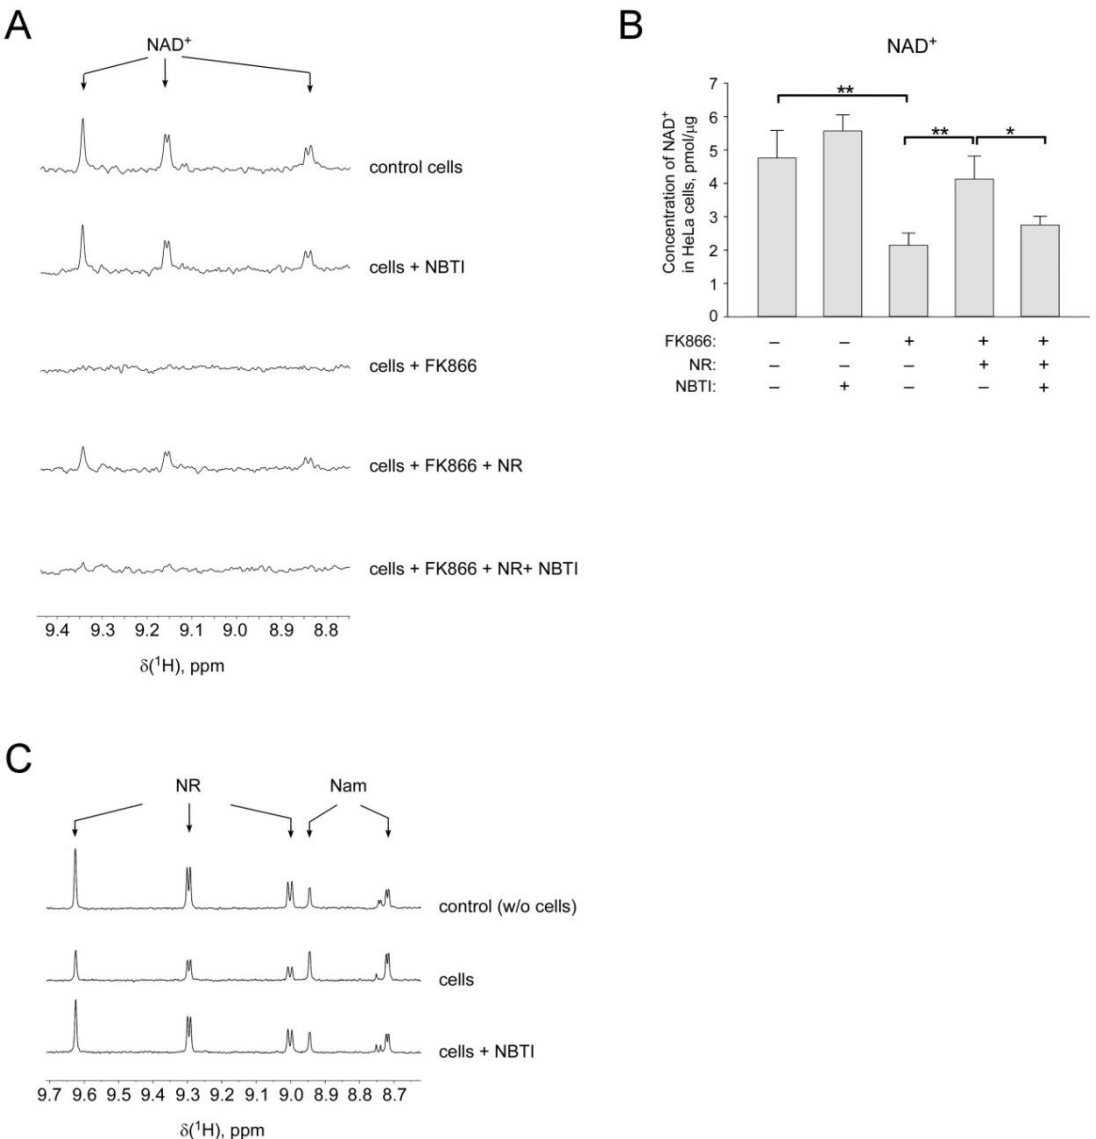

**Figure S1. The effect of ENT inhibition on NR utilization by HEK293 and HeLa cells for NAD<sup>+</sup> biosynthesis.** HEK293 (A and C) and HeLa (B) cells were cultivated in Dulbecco's modified Eagle's medium (DMEM) containing Nam, supplemented with 10% fetal bovine serum (FBS). Cells were treated with nicotinamide riboside (NR) (100  $\mu$ M) and inhibitor of equilibrative nucleoside transporters S-(4-nitrobenzyl)-6-thioinosine (NBTI) as indicated. To inhibit NAD<sup>+</sup> synthesis from Nam, cells were also treated with FK866 (A and B). 24 h after the treatment, cell extracts (A and B) and culture media (C) were analyzed by NMR spectroscopy. (A) represents <sup>1</sup>H NMR spectra of HEK293 cell extracts. *Arrows* indicate peaks corresponding to NAD<sup>+</sup>. (B) The concentration of intracellular NAD<sup>+</sup> in HeLa cells is expressed in picomoles per microgram of total protein in cell extract. Data are presented as mean  $\pm$  S.D (n = 3). Statistical analysis of differences between the groups was carried out by one-way ANOVA with post hoc comparisons using Tukey test. \* indicates statistical significance at p < 0.05, \*\* indicates statistical significance at p < 0.01. (C) represents <sup>1</sup>H NMR spectra of culture medium from HEK293 cells. *Arrows* indicate peaks corresponding to NR and Nam.

**Figure S2**

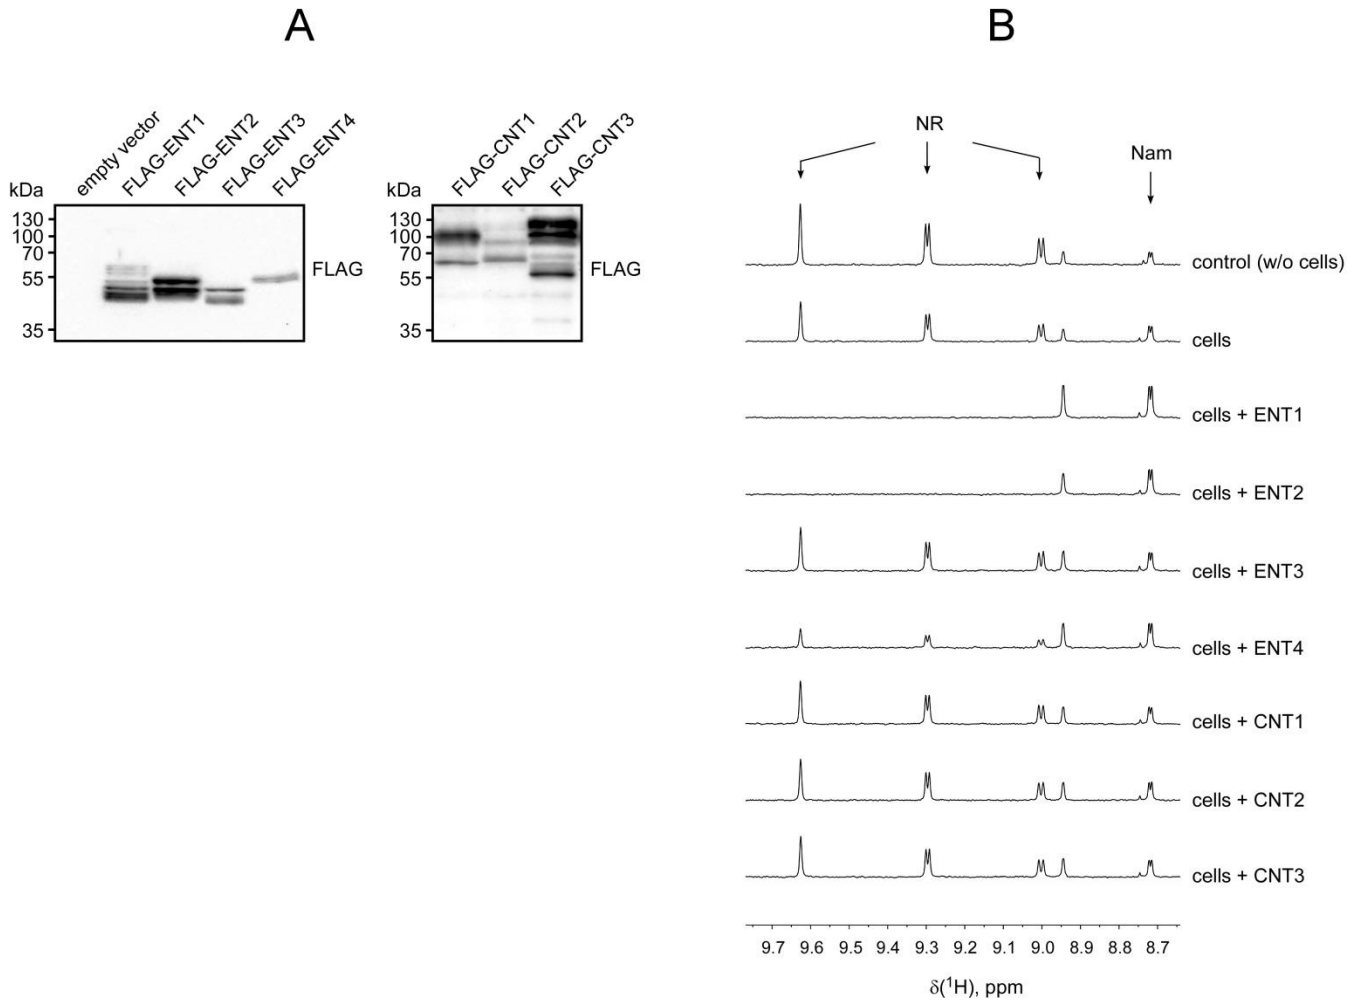

**Figure S2. Overexpression of ENT1, ENT2 and ENT4 stimulates NR uptake into HEK293 cells.** HEK293 cells cultivated in DMEM were transiently transfected with empty vector or with vectors encoding FLAG-tagged ENT1-4 or CNT1-3. (A) 48 hours after transfection the expression of FLAG-tagged proteins was confirmed by immunoblotting using antibody to FLAG peptide. (B) 24h after transfection cells were treated with NR (100  $\mu\text{M}$ ). 24h after treatment, culture medium was analyzed by NMR spectroscopy. Control medium was incubated under the same conditions without cells.  $^1\text{H}$  NMR spectra of culture medium are presented. *Arrows* indicate peaks corresponding to NR and Nam.

**Figure S3**

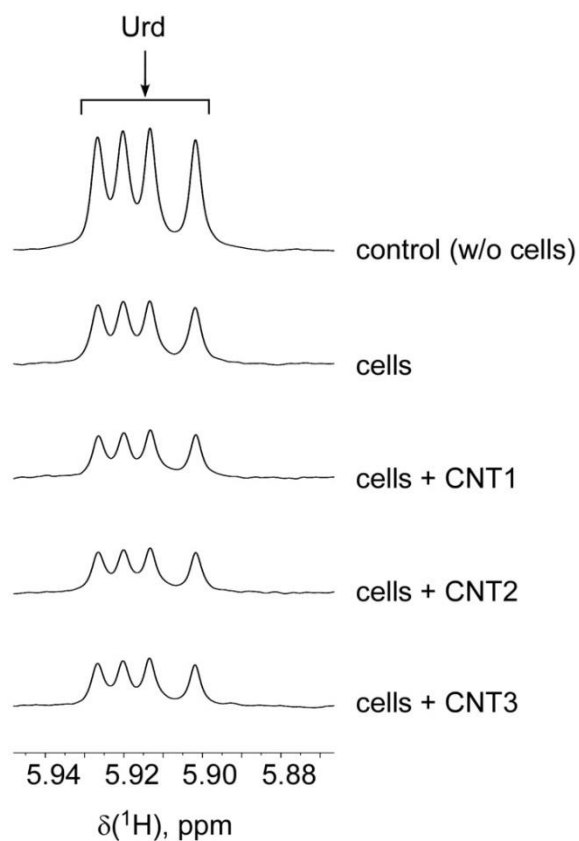

**Figure S3. Overexpression of CNT1, CNT2 and CNT3 stimulates Urd uptake into HEK293 cells.** HEK293 cells cultivated in DMEM were transiently transfected with empty vector or with vectors encoding FLAG-tagged CNT1, 2, or 3 as indicated. 24h after transfection cells were treated with uridine (Urd) (150  $\mu$ M). 24h after treatment culture medium was analyzed by NMR spectroscopy. Control medium was incubated under the same conditions without cells. <sup>1</sup>H NMR spectra of culture medium are presented. *Arrow* indicates peaks corresponding to Urd.

**Figure S4**

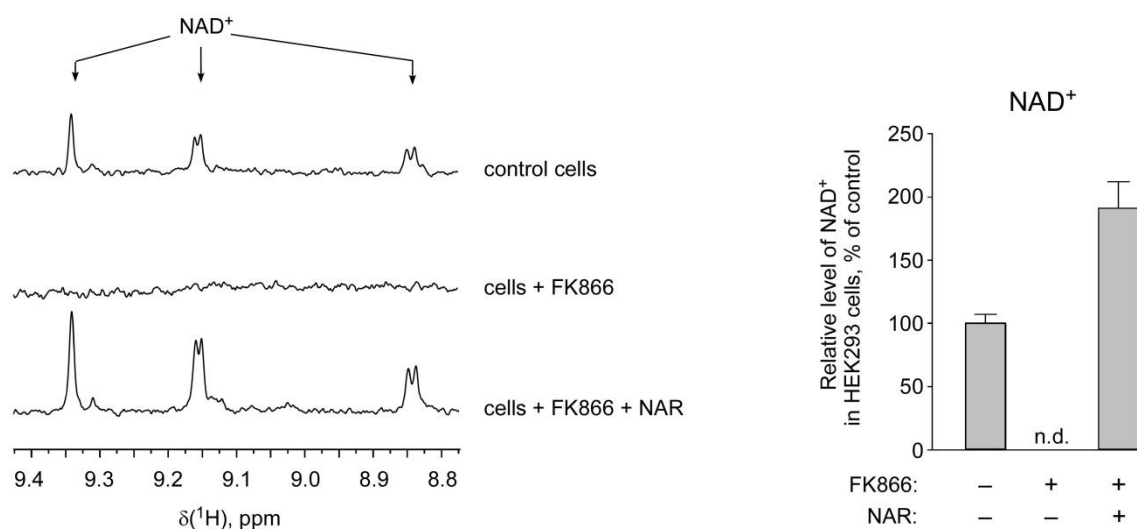

**Figure S4. Extracellular NAR supports NAD<sup>+</sup> generation in HEK293 cells.** HEK293 cells were cultivated in DMEM containing Nam, supplemented with 10% FBS. To inhibit NAD<sup>+</sup> synthesis from Nam, cells were treated with FK866 (2  $\mu$ M). Cells were also treated with nicotinic acid riboside (NAR) at a concentration of 100  $\mu$ M. 24 h after the treatment, cell extracts were analyzed by quantitative NMR spectroscopy. The left panel represents <sup>1</sup>H NMR spectra of HEK293 cell extracts. *Arrows* indicate peaks corresponding to NAD<sup>+</sup>. The right panel shows relative levels of intracellular NAD<sup>+</sup> in cell extracts. Amount of NAD<sup>+</sup> in control cell extract obtained from untreated cells was taken as 100%. Data are presented as mean  $\pm$  S.D. n.d. – not detected.

**Figure S5**

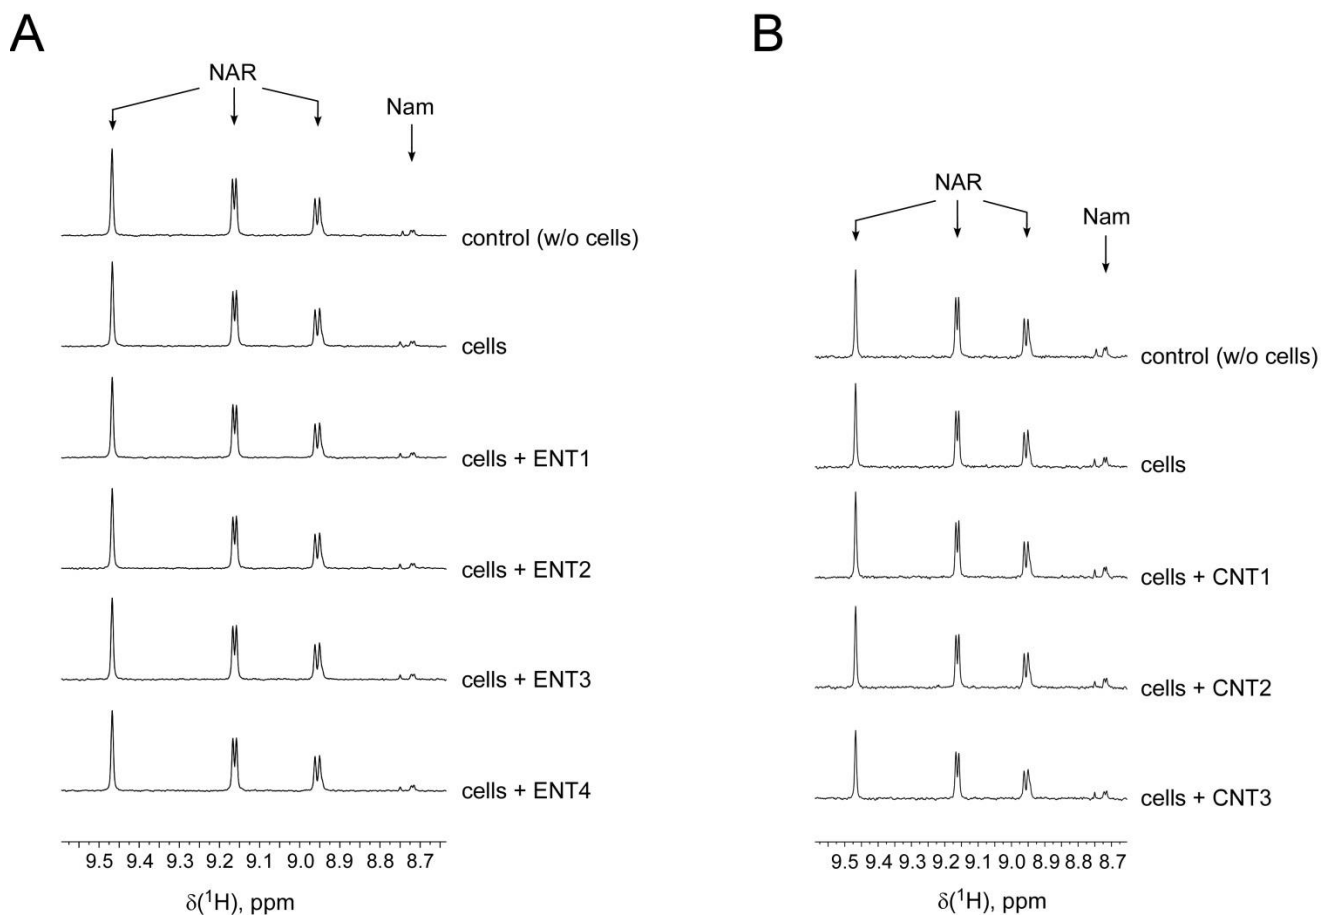

**Figure S5. The effect of overexpression of ENT1-4 and CNT1-3 on NAR uptake into HEK293 cells.** HEK293 cells cultivated in DMEM were transiently transfected with empty vector or with vectors encoding FLAG-tagged ENT1, 2, 3, 4 (A) or FLAG-tagged CNT1, 2, 3 (B) as indicated. 24h after transfection cells were treated with nicotinic acid riboside (NAR) at a concentration of 100  $\mu\text{M}$  (A) or 50  $\mu\text{M}$  (B). 24h after treatment culture medium was analyzed by NMR spectroscopy. Control medium was incubated under the same conditions without cells.  $^1\text{H}$  NMR spectra of culture medium are presented. *Arrows* indicate peaks corresponding to NAR and Nam.

## Figure S6

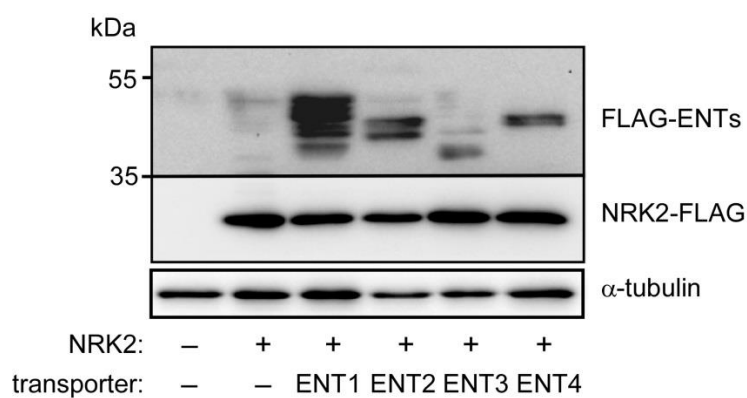

**Figure S6. Co-expression of NRK2 and ENT1, ENT2, ENT2 or ENT4 in HEK293 cells.** HEK293 cells cultivated in DMEM were transiently cotransfected with vector encoding FLAG-tagged NRK2 and vectors encoding FLAG-tagged ENT1, ENT2, ENT2 or ENT4 as indicated. 48 hours after transfection the expression of FLAG-tagged proteins was confirmed by immunoblotting using antibody to FLAG peptide.  $\alpha$ -tubulin served as a loading control.

**Table S1. Primers used for cloning of the sequences encoding human ENT1-4 and CNT1-3 proteins into the pFLAG-CMV-4 vector.**

| Gene<br>(GenBank accession number) | Primers                           | Encoded protein |
|------------------------------------|-----------------------------------|-----------------|
| <i>SLC29A1</i> (NM_001078177)      | Forward                           | FLAG-ENT1       |
|                                    | Reverse                           |                 |
| <i>SLC29A2</i> (NM_001300868)      | Forward                           | FLAG-ENT2       |
|                                    | Reverse                           |                 |
| <i>SLC29A3</i> (NM_018344)         | Forward                           | FLAG-ENT3       |
|                                    | Reverse                           |                 |
| <i>SLC29A4</i> (NM_001040661)      | Forward<br>(w/o restriction site) | FLAG-ENT4       |
|                                    | Reverse<br>(w/o restriction site) |                 |
|                                    | Forward                           |                 |
|                                    | Reverse                           |                 |
| <i>SLC28A1</i> (NM_004213)         | Forward<br>(w/o restriction site) | FLAG-CNT1       |
|                                    | Reverse<br>(w/o restriction site) |                 |
|                                    | Forward                           |                 |
|                                    | Reverse                           |                 |
| <i>SLC28A2</i> (NM_004212)         | Forward<br>(w/o restriction site) | FLAG-CNT2       |
|                                    | Reverse<br>(w/o restriction site) |                 |
|                                    | Forward                           |                 |
|                                    | Reverse                           |                 |
| <i>SLC28A3</i> (NM_001199633)      | Forward                           | FLAG-CNT3       |
|                                    | Reverse                           |                 |
